# Supplementary material for: Effects of unaltered and bioconverted mulberry leaf extracts on cellular glucose uptake and antidiabetic action in animals
Source: Springer Nature journal article supplement (doi:10.1186/s12906-019-2460-5), 2019-03-06
Supplement: MOESM1 [file 16529920]

**A**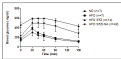

|                  | 0        | 10       | 20       | 40       | 60       | 80       | 100      |
|------------------|----------|----------|----------|----------|----------|----------|----------|
| NL(n=7)          | 100 ± 10 | 105 ± 10 | 110 ± 10 | 105 ± 10 | 100 ± 10 | 100 ± 10 | 100 ± 10 |
| HFD(n=7)         | 100 ± 10 | 130 ± 10 | 140 ± 10 | 135 ± 10 | 130 ± 10 | 125 ± 10 | 120 ± 10 |
| HFD+OLE (n=6)    | 100 ± 10 | 115 ± 10 | 110 ± 10 | 105 ± 10 | 100 ± 10 | 95 ± 10  | 90 ± 10  |
| HFD+OLE+NA (n=6) | 100 ± 10 | 105 ± 10 | 100 ± 10 | 95 ± 10  | 90 ± 10  | 85 ± 10  | 80 ± 10  |

**B**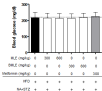

|  | control       | MLE           |               | DMLE          |               | Metformin  |
|--|---------------|---------------|---------------|---------------|---------------|------------|
|  |               | low           | high          | low           | high          |            |
|  | 217.3 ± 34.36 | 214.2 ± 31.36 | 212.7 ± 29.65 | 212.2 ± 29.18 | 217.3 ± 26.80 | 226 ± 28.9 |
