# Supplementary material for: Effects of unaltered and bioconverted mulberry leaf extracts on cellular glucose uptake and antidiabetic action in animals
Source: Springer Nature journal article supplement (doi:10.1186/s12906-019-2460-5), 2019-03-06

**A****C2C12 myotubes**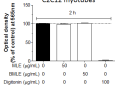**B****3T3-L1 adipocytes**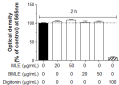**C****HIT-T15 pancreatic  $\beta$  cells**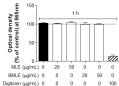

Supplement: MOESM2 [file 16529920]
